# Supplementary material for: Ficolin-2 inhibitors are present in sera after prolonged storage at −80 °C
Source: PeerJ. 2016 Nov 17;4:e2705. doi: 10.7717/peerj.2705 (PMC5119277; doi:10.7717/peerj.2705)
Supplement: Figure S1 [file peerj-04-2705-s001.xlsx]

## Sheet: Sheet1
Ficolin-2 content (µg/ml)
Young controls	Older individuals
0.912478	2.2
2.24515	2.22
2.41416	2.47
2.71021	1.23
2.82307	1.28
3.03481	1.58
3.14779	0.99
3.60009	2.43
3.88307	1.53
3.89722	3.01
3.98216	1.56
4.12375	1.45
4.3504	1.48
4.54881	1.65
4.64804	1.35
5.27226	1.86
5.35744	1.85
5.52783	2.41
6.46586	1.82
7.7898	2.19
Young data are reproduced from Brady 2014c with permission as indicated in the manuscript.
