# Supplementary material for: Ficolin-2 inhibitors are present in sera after prolonged storage at −80 °C
Source: PeerJ. 2016 Nov 17;4:e2705. doi: 10.7717/peerj.2705 (PMC5119277; doi:10.7717/peerj.2705)
Supplement: Figure S2 [file peerj-04-2705-s002.xlsx]

## Sheet: Sheet1
Sample	Ficolin-2 Deposition (MFI)	Ficolin-2 deposition (log MFI)	Ficolin-2 content (µg/ml)
Elderly 1	2.25	0.352183	0.711704
Elderly 2	2.09	0.320146	0.8
Elderly 3	2.2	0.342423	0.6
Elderly 4	65.75	1.8179	2.12064
Elderly 5	200.4	2.3019	2.8
NHS	412.06	2.61496	4.3
