# Supplementary material for: Ficolin-2 inhibitors are present in sera after prolonged storage at −80 °C
Source: PeerJ. 2016 Nov 17;4:e2705. doi: 10.7717/peerj.2705 (PMC5119277; doi:10.7717/peerj.2705)
Supplement: Figure S3 [file peerj-04-2705-s003.xlsx]

## Sheet: Iteration 0 (2)
Sample	Treatment	Dilution	FCN2
Inhibiting 1	Heat-Inactivated	80	4.51
Inhibiting 1	Heat-Inactivated	320	7.54
Inhibiting 1	Heat-Inactivated	1280	17.07
Inhibiting 1	Heat-Inactivated	5120	31.06
Inhibiting 1	Heat-Inactivated	20480	34.23
Inhibiting 1	No Treatment	80	3.72
Inhibiting 1	No Treatment	320	8.6
Inhibiting 1	No Treatment	1280	18.8
Inhibiting 1	No Treatment	5120	42.74
Inhibiting 1	No Treatment	20480	43.66
Inhibiting 2	Heat-Inactivated	80	4.23
Inhibiting 2	Heat-Inactivated	320	5.3
Inhibiting 2	Heat-Inactivated	1280	20.56
Inhibiting 2	Heat-Inactivated	5120	32.24
Inhibiting 2	Heat-Inactivated	20480	34.31
Inhibiting 2	No Treatment	80	3.75
Inhibiting 2	No Treatment	320	6.03
Inhibiting 2	No Treatment	1280	23.475
Inhibiting 2	No Treatment	5120	34.44
Inhibiting 2	No Treatment	20480	40.19
Noninhibiting Serum	Heat-Inactivated	80	33.55
Noninhibiting Serum	Heat-Inactivated	320	37.185
Noninhibiting Serum	Heat-Inactivated	1280	39.135
Noninhibiting Serum	Heat-Inactivated	5120	37.57
Noninhibiting Serum	Heat-Inactivated	20480	36.035
Noninhibiting Serum	No Treatment	80	90.09
Noninhibiting Serum	No Treatment	320	49.98
Noninhibiting Serum	No Treatment	1280	41.19
Noninhibiting Serum	No Treatment	5120	40.795
Noninhibiting Serum	No Treatment	20480	42.9
No FCN2			3.595
No Serum			28.4667
