# Supplementary material for: Ficolin-2 inhibitors are present in sera after prolonged storage at −80 °C
Source: PeerJ. 2016 Nov 17;4:e2705. doi: 10.7717/peerj.2705 (PMC5119277; doi:10.7717/peerj.2705)
Supplement: Figure S4A [file peerj-04-2705-s004.xlsx]

## Sheet: Plate 1 - Sheet1
Figure 4A data (Young reproduced as in figure 1)
Inhibit?	Ficolin-2 (µg/ml)
No	2.98067
No	3.27201
No	2.67155
No	3.58555
No	6.03007
No	2.15444
No	3.96001
No	2.96089
No	3.27201
No	2.63248
Yes	1.65384
Yes	2.2208
Yes	1.75185
Yes	2.18897
Yes	1.90608
Yes	0.378695
Yes	2.9787
Yes	1.93191
Yes	1.31962
Yes	2.07961
