# Supplementary material for: Ficolin-2 inhibitors are present in sera after prolonged storage at −80 °C
Source: PeerJ. 2016 Nov 17;4:e2705. doi: 10.7717/peerj.2705 (PMC5119277; doi:10.7717/peerj.2705)
Supplement: Figure S5 [file peerj-04-2705-s006.xlsx]

## Sheet: Sheet1
FIGURE 5 data
Archived sample vs. freshly drawn, donor-matched
Sample	Ficolin-2 (µg/ml)		Two-tailed paired t-test
New 1	3.34904	P	0.0348834
New 2	3.3265
New 3	2.59073
New 4	3.43764
New 5	6.76743
Old 1	1.26897
Old 2	2.923
Old 3	1.93706
Old 4	1.53375
Old 5	3.39985
